# Supplementary material
Source: MDPI journal article supplement (https://www.mdpi.com/search?q=diversity-03-00531)
Supplement: s001 [file diversity-03-00531-s001.pdf]

# Supplementary Information

**Annex 1.** List of plant species collected in Al-shouf and Ehden cedar forests during data collection following the designed sampling strategy and field explorations held between 2000 and 2003.

## **Family Acanthaceae**

*Acanthus syriacus* Boiss.

## **Family Amaranthaceae**

*Chenopodium virgatum* Ambrosi

## **Family Amaryllidaceae**

*Sternbergia clusiana* Ker-Gawler

## **Family Anacardiaceae**

*Pistacia palaestina* Boiss.

## **Family Apiaceae**

*Bupleurum linearifolium* DC.

*Chaetosciadium trichospermum* Boiss.

*Daucus carota* L.

*Lagoecia cuminoides* L.

*Prangos asperula* Boiss.

*Scandix australis* L. subsp. *grandiflora* (L.) Thell.

*Tordylium cordatum* Poir.

## **Family Apocynaceae**

*Vinca libanotica* Zucc.

## **Family Asteraceae**

*Achillea kotschy* Boiss.

*Achillea odorata* W. Koch.

*Anthemis chia* L.

*Anthemis hyalina* DC.

*Anthemis tinctoria* L.

*Anthemis tinctoria* L. var. *dioscoidea* (All.) Vahl.

*Anthemis tricolor* L.

*Anthriscus lamprocarpa* Boiss.

*Calendula palaestina* Boiss.

*Carlina involucrata* Poiret subsp. *libanotica* (Boiss.) Meusel & Kastner

*Centaurea calcitrapa* L.

*Centaurea iberica* Trevir. ex. Sprengel

*Centaurea triumfetti* All.

*Cephalorrhynchus tuberosus* (Steven) Schchian

*Crepis syriaca* (Bornm.) Bab. & Navashin.  
*Cruciata coronata* (Sibth. & Sm.) Ehrend.  
*Crupina crupinastrum* Vis.  
*Doronicum orientale* Hoffm.  
*Gundelia tournefortii* L.  
*Helichrysum conglobatum* Steudel. subsp. *conglobatum*  
*Helichrysum pallasii* Ledeb.  
*Helichrysum plicatum* DC. subsp. *plicatum* DC.  
*Inula salicina* L.  
*Matricaria chamomilla* L.  
*Matricaria recutita* (L.) Reuschert  
*Pallenis spinosa* (L.) Cass  
*Picnomon carota* L.  
*Ptilostemon diacantha* (Labill.) Greuter subsp. *diacantha*  
*Scolymus maculatus* L.  
*Scorzonera mollis* M. Bieb.  
*Senecio vernalis* Waldst. & Kit.  
*Serratula pusilla* (Labill.) Dittrich  
*Tanacetum aucheri* DC.

#### **Family Berberidaceae**

*Berberis libanotica* Ehrenb. Ex C. K. Schneid.

#### **Family Boraginaceae**

*Anchusa strigosa* Labill.  
*Brunnera orientalis* I. M. Johnst.  
*Cynoglossum montanum* L.  
*Onosma frutescens* Lam.  
*Onosma orientalis* L.  
*Solenanthus stamineus* J. F. Macbr.  
*Symphytum palaestinum* Boiss.

#### **Family Brassicaceae**

*Aethionema coridifolium* DC.  
*Alyssum murale* Waldst. & Kit.  
*Aubrietia libanotica* Boiss.  
*Barbarea minor* C. Koch Syn: *Barbarea brachycarpa* Boiss.  
*Biscutella ciliata* DC.  
*Cardaria draba* (L.) Desv.  
*Fibigia clypeata* Medik.  
*Fibigia eriocarpa* Boiss.  
*Fibigia* sp. [Undefined]

**Family Campanulaceae**

*Asyneuma virgatum* Bornm.

*Campanula stricta* L.

*Legousia pentagonia* Thell.

*Sterigmostemum sulphureum* (Banks & Sol.) Bornm.

*Thlaspi microstylum* Boiss.

**Family Caprifoliaceae**

*Lonicera nummularifolia* Jaub. & Spach.

*Morina persica* L.

**Family Caryophyllaceae**

*Dianthus strictus* Banks & Sol. subsp. *multipunctatus* (Ser.) Mouterde ex. Greuter & Burdet

*Dianthus libanotis* Labill.

*Silene aegyptiaca* L.f.

*Silene grisea* Boiss.

*Silene italica* (L.) Pers.

*Silene longipetala* Vent.

*Silene makmeliana* Boiss.

*Silene odontopetala* Fenzl.

*Silene vulgaris* (Moench) Garcke

*Telephium imperati* L. var. *orientale* Boiss.

**Family Cistaceae**

*Cistus salviifolius* L.

*Halimium syriacum* K. Koch.

**Family Crassulaceae**

*Umbilicus intermedius* Boiss.

*Rosularia libanotica* (L.) Sam.

*Sedum tenuifolium* DC.

**Family Cucurbitaceae**

*Bryonia multiflora* Boiss. & Heldr.

**Family Dioscoreaceae**

*Tamus communis* L.

**Family Dipsacaceae**

*Cephalaria* sp. [Undefined]

**Family Euphorbiaceae**

*Euphorbia macroclada* Boiss.

**Family Fabaceae**

*Anthyllis maura* Beck.

*Astragalus coluteoides* Willd.

*Astragalus ehdenensis* Mouterde.

*Astragalus emarginatus* Labill.

*Astragalus gaillardotii* Boiss.

*Astragalus gummifer* Labill.

*Astragalus neurocarpus* Boiss.

*Astragalus pinetorum* Boiss.

*Astragalus sofarensis* Thieb.

*Coronilla emeroides* Boiss. & Spruner

*Cytisopsis dorycniiifolia* Jaub. & Spach. (Syn: *Crotalaria pseudocytissus* (Boiss.) Fertig.).

*Lathyrus libani* Fritsch.

*Lathyrus sativus* L.

*Lathyrus spathulatus* Čelak.

*Lotus corniculatus* L. var. *alpinus* (Schleich.) Boiss.

*Medicago sativa* L.

*Onobrychis cornuta* (L.) Desv.

*Trifolium boissieri* Guss.

*Trifolium clypeatum* L.

*Trifolium filiforme* L.

*Trifolium fragiferum* L.

*Trifolium pilulare* Boiss.

*Trifolium purpureum* Loisel.

*Trifolium speciosum* Willd.

*Trifolium stellatum* L.

*Vicia* sp. [Undefined]

*Vicia tenuifolia* Roth.

**Family Geraniaceae**

*Erodium acaule* Bech. & Thell.

*Geranium libani* P.H.Davis.

*Geranium rotundifolium* L.

**Family Hyacinthaceae**

*Hyacinthus orientalis* L.

*Ornithogalum billardieri* Mouterde.

*Ornithogalum libanoticum* Boiss.

*Puschkinia scilloides* Adams subsp. *libanotica* (Zucc.) Boiss.

*Scilla cilicica* Siehe

### **Family Hypericaceae**

*Hypericum retusum* Auch.

*Hypericum thymifolium* Sol.

### **Family Illecebraceae**

*Herniaria incana* Lam.

*Paronychia argentea* Lam.

### **Family Iridaceae**

*Crocus cancellatus* Herb.

*Romulea nivalis* (Boiss. & Ky.) Klatt.

### **Family Lamiaceae**

*Ajuga tridactylites* Ging. ex. Benth.

*Lamium amplexicaule* L.

*Lamium moschatum* Mill.

*Marrubium libanoticum* Boiss.

*Micromeria myrtifolia* Boiss. & Hohen.

*Nepeta flavida* Huber-Mor.

*Origanum ehrenbergii* Boiss. x *O. syriacum* Boiss.

*Origanum libanoticum* Boiss.

*Origanum syriacum* L.

*Phlomis chrysophylla* Boiss.

*Salvia microstegia* Boiss. & Bal.

*Salvia multicaulis* Vahl.

*Salvia rubifolia* Boiss.

*Scutellaria brevibracteata* Stapf.

*Scutellaria orientalis* L. subsp. *alpina* Boiss.

*Scutellaria tomentosa* Bertol.

*Sideritis libanotica* Labill.

*Sideritis perfoliata* L.

*Stachys cretica* L.

*Stachys ehrenbergii* Boiss.

*Teucrium divaricatum* Sieb. ex. Heldr.

*Teucrium polium* L.

*Thymbra spicata* L.

### **Family Liliaceae**

*Colchicum decaisnei* Boiss.

*Fritillaria amopetala* Boiss.

*Gagea peduncularis* (Presl.) Pasc.

*Gagea reticulata* (Pall.) Schutt.

*Gagea* sp. [Undefined]

*Tulipa alepensis* Regel

### **Family Linaceae**

*Linum pubescens* Banks & Sol.

### **Family Orchidaceae**

*Orchis anatolica* Boiss.

*Orchis comperiana* Stev.

*Orchis italica* Poir.

*Orchis romana* Boiss subsp. *libanotica* Mt.

*Orchis tridentata* Scop.

*Serapias vomeracea* (Burnm.) Briquet

### **Family Papaveraceae**

*Corydalis solida* (L.) Swartz

*Fumaria gaillardotii* Boiss.

*Fumaria* sp. [Undefined]

*Glaucium leiocarpum* Boiss.

*Hypecoum imberbe* Sibth. & Smith

*Papaver rhoeas* L.

### **Family Phytolaccaceae**

*Phytolacca pruinosa* Fenzl.

### **Family Plumbaginaceae**

*Acantholimon libanoticum* Boiss.

### **Family Poaceae**

*Aegilops* sp. [Undefined]

*Arrhenatherum palaestinum* Boiss.

*Avena* sp. [Undefined]

*Bromus sterilis* L.

*Dactylis glomerata* L.

*Festuca* sp. [Undefined]

*Hordeum* sp. [Undefined]

*Melica ciliata* L.

*Phalaris bulbosa* L.

*Phleum montanum* K. Koch.

*Phleum* sp. [Undefined]

*Stipa barbata* Desf.

### **Family Polygalaceae**

*Polygala supina* Schreb.

### **Family Primulaceae**

*Cyclamen coum* Mill.

### **Family Ranunculaceae**

*Anemone blanda* Scott. & Ky.

*Anemone coronaria* L. var. *phoenicea* Ard.

*Anemone coronaria* L. var. *rosea* (Hanry) Batt.

*Ficaria grandiflora* Robert

*Ranunculus cuneatus* Boiss.

*Ranunculus ficaria* L. subsp. *ficarii formis* Rouy. & Fouc.

*Ranunculus hierosolymitanus* Boiss.

*Ranunculus neapolitanus* Ten.

*Ranunculus paludosus* Poir.

### **Family Rhamanceae**

*Rhamnus libanotica* Boiss.

### **Family Rosaceae**

*Geum urbanum* L.

*Rosa canina* L.

*Sanguisorba minor* Scop.

### **Family Rubiaceae**

*Asperula libanotica* Boiss.

*Asperula stricta* Boiss.

*Galium canum* Req. ex. DC.

*Galium incanum* Sibth & Sm.

*Galium libanoticum* Ehrend.

*Galium verum* L.

*Rubia aucheri* Boiss.

*Rubia tenuifolia* Poir.

### **Family Sapindaceae**

*Acer hyrcanum* Fisch. & Mey.

*Acer hyrcanum* Fisch. & Mey. var. *tauricaulum* (Boiss. & Bal.) Boiss.

**Family Scrophulariaceae**

*Anarrhinum orientale* Benth.

*Veronica orientalis* Mill.

*Veronica persica* Poir.

*Veronica syriaca* Roem. & Schult.

**Family Solanaceae**

*Hyoscyamus albus* L.

**Family Urticaceae**

*Parietaria* sp. [Undefined]

**Family Valerianaceae**

*Centranthus longiflorus* Stev. subsp. *latifolius* Boiss.
